# Supplementary material
Source: PubMed Central journal article supplement (PMC10184023)
Supplement: NIHMS1897322-supplement-eTable_1_and_eTable_2.pdf [file NIHMS1897322-supplement-eTable_1_and_eTable_2.pdf]

## Supplemental Online Content

Shah UA, Iyengar NM. Plant-based and ketogenic diets as diverging paths to address cancer: a review. *JAMA Oncol*. Published online July 7, 2022. doi:10.1001/jamaoncol.2022.1769

**eTable 1.** Whole Foods Plant Based Diets in Cancer Interventional Clinical Trials

**eTable 2.** Ketogenic Diets in Cancer Interventional Clinical Trials

This supplemental material has been provided by the authors to give readers additional information about their work.

## eTable 1: Whole Foods Plant Based Diets in Cancer Interventional Clinical Trials

Active – 6; Completed – 2; Unknown – 0; Terminated – 0

Search key words: Vegetarian + Cancer, Vegan + Cancer, Plant based + Cancer

[www.clinicaltrials.gov](http://www.clinicaltrials.gov)

| NCT Number  | Title                                                                                                                                       | Status     | Conditions                                                                     | Interventions                                                                                                                           |
|-------------|---------------------------------------------------------------------------------------------------------------------------------------------|------------|--------------------------------------------------------------------------------|-----------------------------------------------------------------------------------------------------------------------------------------|
| NCT04298086 | A Study of the Body's Response to Exercise and a Plant-Based Diet in Overweight Postmenopausal Women With Breast Cancer                     | Recruiting | Breast Cancer Primary Hormone Receptor Positive Breast Cancer                  | Other: Exercise Treatment Other: Plant-Based Diet Other: Physical activity Other: Nutrition counseling Other: Replication Exercise Test |
| NCT03045289 | A Whole-food, Plant-Based Nutrition Intervention in Women With Metastatic Breast Cancer                                                     | Recruiting | Metastatic Breast Cancer Breast Cancer Stage IV                                | Behavioral: Plant-Based Diet                                                                                                            |
| NCT04528615 | Testing the Effectiveness of Coping With Cancer in the Kitchen (CCK)                                                                        | Completed  | Cancer Nutrition Aspect of Cancer                                              | Behavioral: CCK In-Person Sessions Behavioral: CCK Printed Materials                                                                    |
| NCT03550885 | Diet Modulation of Bacterial Sulfur and Bile Acid Metabolism and Colon Cancer Risk                                                          | Recruiting | Colorectal Cancer                                                              | Other: High taurine and saturated fat diet Other: Low in taurine and saturated fat diet                                                 |
| NCT03084913 | Olive Oil v Prostate Cancer Foundation Diet for Treatment of Prostate Cancer                                                                | Completed  | Prostate Cancer                                                                | Other: Plant- based, olive oil diet Other: Prostate Cancer Foundation diet                                                              |
| NCT04920084 | A Study of a Plant-Based Diet in People With Monoclonal Gammopathy of Undetermined Significance (MGUS) or Smoldering Multiple Myeloma (SMM) | Recruiting | Monoclonal Gammopathy of Undetermined Significance Smoldering Multiple Myeloma | Other: Plant based meals                                                                                                                |
| NCT04866810 | The Effect of Diet and Exercise on ImmuNotherapy and the Microbiome (EDEN)                                                                  | Recruiting | Melanoma                                                                       | Behavioral: Intervention Arm Behavioral: Control                                                                                        |
| NCT04957693 | Effect of Vegan Diet and Lifestyle Changes on Indolent Lymphoma During Controlled Waiting Period                                            | Recruiting | Indolent Lymphoma                                                              | Behavioral: vegan diet and lifestyle changes                                                                                            |

## eTable 2: Ketogenic Diets in Cancer Interventional Clinical Trials

Active – 20; Completed – 10; Unknown – 5; Terminated – 6

Search key words: Ketogenic Diet + Cancer

| NCT Number  | Title                                                                                                           | Status             | Conditions                                      | Interventions                                                                                                                                                        |
|-------------|-----------------------------------------------------------------------------------------------------------------|--------------------|-------------------------------------------------|----------------------------------------------------------------------------------------------------------------------------------------------------------------------|
| NCT03194516 | Ketogenic Diet and Prostate Cancer Surveillance Pilot (GCC 1717)                                                | Completed          | Prostate Cancer                                 | Other: Surveillance                                                                                                                                                  |
| NCT01975766 | Ketogenic Diet Phase 1 for Head & Neck Cancer                                                                   | Terminated         | Head and Neck Neoplasms                         | Dietary Supplement: Ketogenic diet Device: External beam radiation therapy                                                                                           |
| NCT03962647 | A 2-Week Ketogenic Diet in Combination With Letrozole to Modulate PI3K Signaling in ER+ Breast Cancer           | Recruiting         | Estrogen Receptor-positive Breast Cancer        | Dietary Supplement: 2-Week Ketogenic Diet Drug: Letrozole                                                                                                            |
| NCT03285152 | A Study of Ketogenic Diet in Newly Diagnosed Overweight or Obese Endometrial Cancer Patients                    | Recruiting         | Endometrial Cancer                              | Other: Ketogenic Diet (KD) Other: Standard Diet (SD)                                                                                                                 |
| NCT01419483 | Ketogenic Diet With Concurrent Chemoradiation for Pancreatic Cancer (KETOPAN)                                   | Terminated         | Pancreatic Neoplasms                            | Dietary Supplement: Ketogenic diet                                                                                                                                   |
| NCT03328858 | Ketogenic Diet in Children With Malignant or Recurrent/Refractory Brain Tumor                                   | Terminated         | Brain Tumors                                    | Other: Ketogenic Diet                                                                                                                                                |
| NCT01716468 | Ketogenic Diet in Advanced Cancer                                                                               | Completed          | Cancer                                          | Other: Ketogenic Diet                                                                                                                                                |
| NCT03535701 | Ketogenic Diet and Chemotherapy in Affecting Recurrence in Patients With Stage IV Breast Cancer (KETO-CARE)     | Recruiting         | Stage IV Breast Cancer AJCC v6 and v7           | Dietary Supplement: Dietary Intervention Other: Laboratory Biomarker Analysis Drug: Paclitaxel Other: Quality-of-Life Assessment Other: Questionnaire Administration |
| NCT03171506 | Targeted Disruption to Cancer Metabolism and Growth Through Dietary Macronutrient Modification                  | Completed          | Ovarian Cancer Endometrial Cancer               | Other: Ketogenic diet Other: AND diet                                                                                                                                |
| NCT03591861 | Therapeutic Targeting of Sex Differences in Pediatric Brain Tumor Glycolysis                                    | Recruiting         | Pediatric Brain Tumor                           | Procedure: Ketogenic diet Drug: BCNU                                                                                                                                 |
| NCT03955068 | Strict Classic Ketogenic Diet as a Therapy for Recurrent or Progressive and Refractory Brain Tumors in Children | Not yet recruiting | Recurrent Brain Tumor, Childhood Ketogenic Diet | Other: Strict Classic Ketogenic Diet                                                                                                                                 |
| NCT01092247 | The Effect of Ketogenic Diet on Malignant Tumors-Recurrence and Progress                                        | Unknown status     | Malignant Tumors                                | Other: Nutritional support with Standard diet Other: Nutritional intervention with the Ketogenic diet                                                                |

|             |                                                                                                              |                        |                                                          |                                                                                                                                         |
|-------------|--------------------------------------------------------------------------------------------------------------|------------------------|----------------------------------------------------------|-----------------------------------------------------------------------------------------------------------------------------------------|
| NCT03160599 | Restricted Calorie Ketogenic Diet as a Treatment in Malignant Tumors                                         | Unknown status         | Malignant Tumors                                         | Other: ketogenic diet                                                                                                                   |
| NCT04750941 | Study of Copanlisib and Ketogenic Diet                                                                       | Recruiting             | Follicular Lymphoma Endometrial Cancer                   | Drug: Copanlisib Other: Ketogenic Diet                                                                                                  |
| NCT04316520 | Ketogenic Diet for Patients Receiving First Line Treatment for Metastatic Renal Cell Carcinoma (CETOREIN)    | Recruiting             | Metastatic Renal Cancer                                  | Dietary Supplement: Ketogenic diet                                                                                                      |
| NCT04631445 | Study Evaluating the Ketogenic Diet in Patients With Metastatic Pancreatic Cancer                            | Recruiting             | Metastatic Pancreatic Ductal Adenocarcinoma              | Other: Ketogenic Diet                                                                                                                   |
| NCT01419587 | Ketogenic Diet With Chemoradiation for Lung Cancer (KETOLUNG)                                                | Terminated             | Carcinoma, Non-Small-Cell Lung                           | Dietary Supplement: Ketogenic diet                                                                                                      |
| NCT04469296 | Diet Modification in Patients With Luminal Early Breast Cancer Candidate for Primary Surgery (MACS)          | Recruiting             | Breast Cancer Surgery                                    | Dietary Supplement: isocaloric ketogenic diet Dietary Supplement: protein restricted diet                                               |
| NCT01535911 | Pilot Study of a Metabolic Nutritional Therapy for the Management of Primary Brain Tumors (Ketones)          | Active, not recruiting | Glioblastoma                                             | Other: Energy restricted Ketogenic Diet (ERKD) (Metabolic Nutritional Therapy)                                                          |
| NCT02092753 | Ketogenic Or LOGI Diet In a Breast Cancer Rehabilitation Intervention (KOLIBRI)                              | Completed              | Quality of Life                                          | Other: Standard diet (SD) Other: Experimental 1: Ketogenic diet (KD). Other: Experimental 2: "Low glycemic and insulinemic" diet (LOGI) |
| NCT02744079 | Comparison of Healthy Diets on Breast Cancer Markers (KetoBreast)                                            | Completed              | Breast Neoplasms                                         | Behavioral: Low carbohydrate diet Behavioral: Low fat diet                                                                              |
| NCT04231734 | Ketogenic Diet in Patients With Untreated Low Tumor Burden Mantle Cell Lymphoma                              | Recruiting             | Mantle Cell Lymphoma Ketogenic Dieting                   | Other: Ketogenic Diet                                                                                                                   |
| NCT02516501 | Impact of a Ketogenic Diet Intervention During Radiotherapy on Body Composition (KETOCOMP)                   | Recruiting             | Neoplasms                                                | Dietary Supplement: MyAmino Dietary Supplement: betaquik Radiation: Radio(chemo)therapy                                                 |
| NCT02964806 | Development and Clinical Validation of Ketogen-based Therapeutic Diet for Pancreaticobiliary Cancer Patients | Completed              | Ketogen-based Therapeutic Diet Pancreaticobiliary Cancer | Dietary Supplement: Ordinary Diet Dietary Supplement: Modified Atkin's Diet Dietary Supplement: Ketogenic Diet                          |
| NCT03785808 | Reducing Insulin, Growth Hormones, and Tumors (RIGHT)                                                        | Terminated             | Diet Modification Lung Cancer                            | Behavioral: Special Diet Therapy (low-carb) Behavioral: Special Diet Therapy (low-fat) Behavioral: Special Diet Therapy (USDA control)  |

|             |                                                                                                                                |                        |                                                          |                                                                                                                    |
|-------------|--------------------------------------------------------------------------------------------------------------------------------|------------------------|----------------------------------------------------------|--------------------------------------------------------------------------------------------------------------------|
| NCT03278249 | Feasibility Study of Modified Atkins Ketogenic Diet in the Treatment of Newly Diagnosed Malignant Glioma                       | Active, not recruiting | Glioblastoma                                             | Other: Modified Atkins Ketogenic Diet                                                                              |
| NCT01865162 | Ketogenic Diet as Adjunctive Treatment in Refractory/End-stage Glioblastoma Multiforme: a Pilot Study (KGDinGBM)               | Unknown status         | Glioblastoma Multiforme                                  | Other: ketogenic diet                                                                                              |
| NCT03679260 | Carbohydrate Restricted Diet Intervention for Men on Prostate Cancer Active Surveillance                                       | Recruiting             | Prostate Cancer                                          | Other: Carbohydrate restricted diet Other: Non-restricted diet Other: Phone counseling with dietitian              |
| NCT02046187 | Ketogenic Diet With Radiation and Chemotherapy for Newly Diagnosed Glioblastoma                                                | Terminated             | Glioblastoma (GBM)                                       | Dietary Supplement: Ketogenic Diet Radiation: Radiation therapy Drug: Temozolomide                                 |
| NCT04730869 | Metabolic Therapy Program In Conjunction With Standard Treatment For Glioblastoma Multiforme                                   | Recruiting             | Glioblastoma Multiforme                                  | Other: Standard Treatment Plus Metabolic Therapy Program                                                           |
| NCT02983942 | Ketogenic Diet Adjunctive to HD-MTX Chemotherapy for Primary Central Nervous System Lymphoma                                   | Unknown status         | Primary Central Nervous System Lymphoma                  | Dietary Supplement: ketogenic diet Dietary Supplement: Routine diet                                                |
| NCT02939378 | Ketogenic Diet Adjunctive to Salvage Chemotherapy for Recurrent Glioblastoma:a Pilot Study (KGDinRGBM)                         | Unknown status         | Glioblastoma Multiforme                                  | Dietary Supplement: Ketogenic diet Dietary Supplement: Standard diet                                               |
| NCT03451799 | Ketogenic Diet in Combination With Standard-of-care Radiation and Temozolomide for Patients With Glioblastoma                  | Active, not recruiting | GBM Glioblastoma                                         | Other: Ketogenic Diet Radiation: Standard-of-care radiation Drug: Standard-of-care Temozolomide                    |
| NCT02302235 | Ketogenic Diet Treatment Adjunctive to Radiation and Chemotherapy in Glioblastoma Multiforme: a Pilot Study (GBMXRT)           | Active, not recruiting | Glioblastoma Multiforme of Brain                         | Other: Ketogenic Diet Other: Standardized Diet                                                                     |
| NCT04691960 | A Pilot Study of Ketogenic Diet and Metformin in Glioblastoma: Feasibility and Metabolic Imaging                               | Recruiting             | Glioblastoma                                             | Other: Ketogenic Diet Drug: Metformin                                                                              |
| NCT01754350 | Calorie-restricted, Ketogenic Diet and Transient Fasting During Reirradiation for Patients With Recurrent Glioblastoma (ERGO2) | Completed              | Recurrent Glioblastoma                                   | Dietary Supplement: calorie-restricted ketogenic diet and transient fasting Dietary Supplement: standard nutrition |
| NCT00575146 | Ketogenic Diet for Recurrent Glioblastoma (ERGO)                                                                               | Completed              | Recurrent Glioblastoma                                   | Dietary Supplement: TAVARLIN                                                                                       |
| NCT03075514 | Ketogenic Diets as an Adjuvant Therapy in Glioblastoma (KEATING)                                                               | Completed              | Glioblastoma Glioblastoma Multiforme Glioblastoma, Adult | Other: MKD Other: MCT                                                                                              |

|             |                                                                                                                   |            |                           |                                                                                      |
|-------------|-------------------------------------------------------------------------------------------------------------------|------------|---------------------------|--------------------------------------------------------------------------------------|
| NCT03510429 | Clinical Validation of Nutritional Supplements("Ketogenic Plus") Developed for Pancreaticobiliary Cancer Patients | Recruiting | Pancreaticobiliary Cancer | Dietary Supplement: Postoperative Nutritional Supplement Other: Routine post-op care |
| NCT03950635 | Dietary Intervention in Patients With a History of Melanoma                                                       | Recruiting | Melanoma                  | Dietary Supplement: Dietary Intervention Other: Questionnaire Administration         |
| NCT02286167 | Glioma Modified Atkins-based Diet in Patients With Glioblastoma (GLAD)                                            | Completed  | Glioblastoma Multiforme   | Other: Diet modification                                                             |
